# Supplementary material
Source: PubMed Central journal article supplement (PMC7807751)
Supplement: ao0c05102_si_001.pdf [file ao0c05102_si_001.pdf]

## **Supporting information**

### **(-)Kusunokinin as a potential aldose reductase inhibitor: Equivalency observed via AKR1B1 dynamics simulation**

Tanotnon Tanawattanasuntorn<sup>1</sup>, Tienthong Thongpanchang<sup>2</sup>, Thanyada Rungrotmongkol<sup>3</sup>, Chonnikan Hanpaibool<sup>3</sup>, Potchanapond Graidist<sup>1</sup>, Varomyalin Tipmaneea<sup>\*,1</sup>

<sup>1</sup>Department of Biomedical Sciences and Biomedical Engineering, Faculty of Medicine, Prince of Songkla University, Hat Yai, Songkhla, Thailand 90110

<sup>2</sup>Department of Chemistry, Faculty of Science and Center of Excellence for Innovation in Chemistry, Mahidol University, Bangkok, Thailand 10400

<sup>3</sup>Biocatalyst and Environmental Biotechnology Research Unit, Department of Biochemistry, Faculty of Science, Chulalongkorn University, Program in Bioinformatics and Computational Biology, Graduate School, Chulalongkorn University, Bangkok 10300

\*Corresponding author. Email: tvaromya@medicine.psu.ac.th

**Table S1.** AKR1B1 ligands used in molecular docking studies

| <b>Ligand</b>   | <b>PubChem CID</b> | <b>Molecular weight (g/mol)</b> |
|-----------------|--------------------|---------------------------------|
| (-)-Kusunokinin | 384876             | 370.4                           |
| Zenarestat      | 5724               | 441.6                           |
| Zopolrestat     | 1613               | 419.4                           |
| Sulindac        | 11245227           | 356.4                           |
| Lidorestat      | 157839             | 376.4                           |
| IDD1219         | 10150300           | 366.4                           |
| Epalrestat      | 1549120            | 319.4                           |
| IDD740          | 10150441           | 377.3                           |
| IDD594          | 4369325            | 416.2                           |
| IDD552          | 448658             | 414.3                           |
| Tolrestat       | 53359              | 357.3                           |
| Tolmetin        | 5509               | 257.3                           |
| Alrestatin      | 2120               | 255.2                           |
| Minalrestat     | 190816             | 449.2                           |
| Ranirestat      | 153948             | 420.2                           |
| Fidarestat      | 160024             | 279.2                           |

| <b>Ligand</b>                | <b>PubChem CID</b> | <b>Molecular weight (g/mol)</b> |
|------------------------------|--------------------|---------------------------------|
| Sorbinil                     | 337359             | 236.2                           |
| Oleanolic acid               | 10494              | 456.7                           |
| AD5467                       | 197383             | 307.4                           |
| $\gamma$ -mangostin          | 13873657           | 380.4                           |
| Arctiin                      | 100528             | 534.6                           |
| Arctigenin                   | 64981              | 372.4                           |
| 10C                          | 76370315           | 328.4                           |
| Caffeic acid phenethyl ester | 5281787            | 284.3                           |
| Retinol                      | 445354             | 286.5                           |
| PGH <sub>2</sub>             | 445049             | 352.5                           |
| UVI2008                      | 124081750          | 427.4                           |
| PGA1                         | 5281912            | 336.5                           |

**Table S2.** Predicted binding energy of (-)-kusunokinin with 41 proteins associated with CSF1R and AKT pathways

| Protein                   | PDB code | Resolution (Å) | Binding energy (kcal/mol) |               | $\Delta\Delta G$ (kcal/mol) |
|---------------------------|----------|----------------|---------------------------|---------------|-----------------------------|
|                           |          |                | (-)-kusunokinin           | Native ligand |                             |
| <b>Cell proliferation</b> |          |                |                           |               |                             |
| AKR1B1                    | 1US0     | 0.66           | -11.11                    | -9.83         | -1.28                       |
| MEK2                      | 1S9I     | 3.20           | -10.14                    | -9.56         | -0.58                       |
| TrkC                      | 3V5Q     | 2.20           | -9.67                     | -13.51        | 3.84                        |
| TrkB                      | 4AT3     | 1.77           | -9.60                     | -9.94         | 0.34                        |
| FGFR3                     | 4K33     | 2.34           | -9.49                     | -8.60         | -0.89                       |
| TR $\alpha$               | 3ILZ     | 1.85           | -9.41                     | -11.48        | 2.07                        |
| EphA3                     | 3DZQ     | 1.75           | -9.42                     | -12.9         | 3.48                        |
| SHIP-1                    | 6IBD     | 1.48           | -9.32                     | -10.85        | 1.53                        |
| TR $\beta$                | 1N46     | 2.20           | -9.31                     | -11.48        | 2.17                        |
| EP3                       | 6M9T     | 2.50           | -9.22                     | -8.08         | -1.14                       |
| EP4                       | 5YHL     | 4.20           | -9.18                     | -11.86        | 2.68                        |
| PDGFRA                    | 5GRN     | 1.77           | -9.10                     | -12.28        | 3.18                        |
| PLA2                      | 1POE     | 2.10           | -8.92                     | -9.10         | 0.18                        |

| Protein | PDB code | Resolution<br>(Å) | Binding energy (kcal/mol) |               | $\Delta\Delta G$<br>(kcal/mol) |
|---------|----------|-------------------|---------------------------|---------------|--------------------------------|
|         |          |                   | (-)-kusunokinin           | Native ligand |                                |
| ALK     | 5FTO     | 2.22              | -8.75                     | -11.65        | 2.90                           |
| DDR2    | 6FER     | 2.87              | -8.74                     | -10.35        | 1.61                           |
| INSR    | 3EKK     | 2.10              | -8.72                     | -10.18        | 1.46                           |
| DDR1    | 3ZOS     | 1.92              | -8.70                     | -10.79        | 2.09                           |
| RON     | 3PLS     | 2.24              | -8.67                     | -8.15         | -0.52                          |
| MER     | 3BPR     | 2.80              | -8.52                     | -7.62         | -0.90                          |
| AKT2    | 2JDO     | 1.80              | -8.39                     | -9.54         | 1.15                           |
| PLCB    | 2ZKM     | 1.62              | -8.27                     | -9.38         | 1.11                           |
| LYN     | 3A4O     | 3.00              | -8.25                     | -8.34         | 0.09                           |
| c-RAF   | 3OMV     | 4.00              | -8.24                     | -9.41         | 1.17                           |
| EphA7   | 3DKO     | 2.00              | -8.16                     | -10.47        | 2.31                           |
| PLCG    | 4FBN     | 2.40              | -8.15                     | -7.82         | -0.33                          |
| B-Raf   | 5CSW     | 2.66              | -8.13                     | -10.96        | 2.83                           |
| FGFR2   | 1OEC     | 2.40              | -8.07                     | -10.1         | 2.03                           |
| FGFR4   | 6JPJ     | 2.64              | -8.05                     | -7.52         | -0.53                          |
| SHP2    | 5EHR     | 1.70              | -8.03                     | -10.74        | 2.71                           |

| Protein               | PDB code | Resolution (Å) | Binding energy (kcal/mol) |               | $\Delta\Delta G$ (kcal/mol) |
|-----------------------|----------|----------------|---------------------------|---------------|-----------------------------|
|                       |          |                | (-)-kusunokinin           | Native ligand |                             |
| EphB1                 | 5MJA     | 2.14           | -7.78                     | -9.16         | 1.38                        |
| EphB3                 | 5L6O     | 1.88           | -7.78                     | -7.62         | -0.16                       |
| AXL                   | 5U6B     | 2.84           | -7.75                     | -9.82         | 2.07                        |
| BTK                   | 6O8I     | 1.42           | -7.68                     | -8.99         | 1.31                        |
| FAK2                  | 3FZR     | 2.70           | -7.67                     | -7.93         | 0.26                        |
| IRS-1                 | 1QQG     | 2.30           | -7.42                     | -7.21         | -0.21                       |
| SHIP-2                | 4A9C     | 2.10           | -7.21                     | -12.79        | 5.58                        |
| MYC                   | 6G6K     | 1.35           | -5.57                     | -4.90         | -0.67                       |
| <b>Cell migration</b> |          |                |                           |               |                             |
| WASP*                 | 1T84     | -              | -8.75                     | -9.77         | 1.02                        |
| CDC42                 | 1DOA     | 2.60           | -8.36                     | -7.67         | -0.69                       |
| <b>Angiogenesis</b>   |          |                |                           |               |                             |
| VEGFR1                | 3HNG     | 2.70           | -8.92                     | -11.68        | 2.76                        |
| TIE2                  | 3L8P     | 2.40           | -8.42                     | -13.04        | 4.62                        |

\* WASP structure was taken from the first conformer of the solution NMR structure.
